# Supplementary material for: A tunable and reversible thermo-inducible bio-switch for streptomycetes
Source: Research Square preprint supplement (doi:10.21203/rs.3.rs-4838944/v1), 2024-08-08
Supplement: Supplementary file 1 [file 1838b0c34397c17e6aff20af.xlsx]

## Sheet: Sheet1
Plasmids used in this study.
Plasmids	Relevant Characteristics
pSET152::RS01-neo	pSET152 containing rheA driven by its native promoter and the neo cassette driven by the hsp18 promoter, AprR, KanR
pSET152::TRS01-neo	pSET152 containing rheA driven by the constitutive hrdB promoter and the neo cassette driven by the hsp18 promoter, AprR, KanR
pSET152::TRS02-neo	pSET152 containing rheA driven by the constitutive hrdB promoter and the neo cassette driven by a modified hsp18 promoter with the insertion of an additional copy of rheO, AprR, KanR
pSET152::TRS02-gusA	A derivative of pSET152::TRS02-neo with the replacement of neo by gusA, AprR
pSET152::PhrdB-egfp	pSET152 containing egfp driven by the hrdB promoter, AprR
pSET152::egfp	pSET152 containing the promoter-less egfp, AprR
pSET152::TRS02-egfp	A derivative of pSET152::TRS02-neo with the replacement of neoby egfp, AprR
pSET152::StrepT-switch-zouA	A derivative of pSET152 containing zouA driven by StrepT-switch, AprR
pSET152::StrepT-switch- dCas9-actI1	A derivative of pSET152 containing dCas9 driven by StrepT-switch with sgRNA targeting actI-ORF1, AprR
pSET152::StrepT-switch- dCas9-ftsZ	A derivative of pSET152 containing dCas9 driven by StrepT-switch with sgRNA targeting ftsz, AprR
pKCcas9::kasO*-KI tipA	A derivative of pKC1139 containing tipA-driven Cas9 with sgRNA targeting SSHG_00313 (indC), and the kasO* promoter situated between homologous arms upstream and downstream of indC, AprR
pKCcas9::kasO*-KI StrepT-switch	A derivative of pKC1139 containing StrepT-switch-driven Cas9 with sgRNA targeting SSHG_00313 (indC), and the kasO* promoter situated between homologous arms upstream and downstream of indC, AprR
pKCcas9::ddptABC	A derivative of pKC1139 containing Cas9 driven by the tipA promoter, dpt guide-RNA and homologous region flanking genes dptA and dptBC, AprR
pKCcas9::StrepT-switch-ddptABC	A derivative of pKC1139 containing Cas9 driven by StrepT-switch, dpt guide-RNA and homologous region flanking genes dptA and dptBC, AprR
pIJ10500::act	A derivative of pIJ10500 containing the act gene cluster with flanking RsA and RsB sites and the neo cassette, HygR, KanR
pET23b::Pneo-neo	pET23b containing the neo cassette and its promoter, AmpR, KanR
pET23b::neo	pET23b containing the promoter-less neo cassette, AmpR
pET23b::StrepT-switch-neo	pET23b containing the coding region of rheA driven by T7 promoter, and the neo cassette driven by RS02, AmpR, KanR
pET23b::EcoT-switch-neo	pET23b containing the coding region of rheA driven by T7 promoter, and the neo cassette driven by a modified lacUV5 promoter with insertion of two rheO sites, AmpR, KanR
pET28a::rheA	pET28a containing the coding region of rheA driven by T7 promoter, KanR
