# Supplementary material for: A tunable and reversible thermo-inducible bio-switch for streptomycetes
Source: Research Square preprint supplement (doi:10.21203/rs.3.rs-4838944/v1), 2024-08-08
Supplement: Supplementary file 1 [file d1b6c90602021b1a954adc20.pdf]

## Supplementary information

### A tunable and reversible thermo-inducible bio-switch for streptomycetes

Lanxin Lv<sup>1,3</sup>, Yudie Fu<sup>1,3</sup>, Shuo Liu<sup>1,3</sup>, Yuxin Zhang<sup>1</sup>, Meiyan Wang<sup>1</sup>, Yinhua Lu<sup>2</sup> and Guoqing Niu<sup>1,\*</sup>

<sup>1</sup> College of Agronomy and Biotechnology, Southwest University, Chongqing 400715, China.

<sup>2</sup> College of Life Sciences, Shanghai Normal University, Shanghai, 200234, China

<sup>3</sup> These authors contributed equally: Lanxin Lv, Yudie Fu, and Shuo Liu.

\* Guoqing Niu

Email: niu062376@swu.edu.cn

**Keywords:** RheA repressor, thermal-inducible bio-switch, CRISPR/Cas9, *Streptomyces*.

#### This PDF file includes:

Supplementary Methods

Supplementary Figures 1 to 6

Supplementary References

## Supplementary Methods

### Culture conditions

Unless otherwise specified, *Streptomyces* strains were cultivated at 28 °C, and *E. coli* strains were maintained at 37 °C. When necessary, antibiotics were applied at concentrations as follows: 100 µg/mL ampicillin, 100 µg/mL apramycin, 50 µg/mL kanamycin, 100 µg/mL hygromycin, and 25 µg/mL chloramphenicol in Luria-Bertani (LB) medium for *E. coli*; 50 µg/mL apramycin, 50 µg/mL hygromycin, and 25 µg/mL nalidixic acid in MS medium for *Streptomyces*.

### Construction of Plasmids

For the construction of pSET152::*RS01-neo*, a 959 bp fragment covering the coding region of *rheA* with the intergenic region between *rheA* and *hsp18* was PCR-amplified from genomic DNA of *S. albidoflavus* J1074 with primer pair RS01 F/R. The *t0* transcriptional terminator was PCR-amplified with primer pair t0 F/R from pIJ8660<sup>1</sup>. The terminator was then assembled with the 959 bp fragment using overlap extension PCR with primers t0 F and RS01 R, and the resulting amplicon was cut with *Xba*I. The promoter-less neomycin phosphotransferase gene (*neo*) of transposon Tn5 origin was PCR-amplified with primer pair neo orfF/R from pUC119::*neo*, and cut with *Eco*RI. Prior to PCR amplification, the neo orfF primer was phosphorylated with T4 polynucleotide kinase to facilitate subsequent ligation. The two fragments were ligated together with *Xba*I/*Eco*RI double-digested pSET152 in a three-piece ligation reaction to generate pSET152::*RS01-neo*. A similar strategy was used for the construction of pSET152::*TRS01-neo* except that the native promoter of *rheA* was replaced by the constitutive *hrdB* promoter and the *tfd* transcriptional terminator. Generation of pSET152::*TRS02-neo* was accomplished with the

insertion of an additional *rheO* immediately after the transcription start site (TSS) of *hsp18* promoter in pSET152::*TRS01-neo*.

For the construction of pSET152::*TRS02-gusA*, the coding region of *gusA* was PCR-amplified with primer pair *gusA* F/R from pSET152-*P<sub>hrdB</sub>-gusA*<sup>2</sup>. The resulting amplicon was used to replace the *neo* cassette in pSET152::*TRS02-neo* to generate pSET152::*TRS02-gusA*. The construction of pSET152::*TRS02-egfp* was achieved with a similar strategy except that the coding region of *egfp* was PCR-amplified with primer pair *egfp* F/R from pIJ8660<sup>1</sup>.

For the construction of pKCcas9::StrepT-switch-*ddptABC*, StrepT-switch was used to replace the *tipA* promoter in pKCcas9dO<sup>3</sup>, resulting in the generation of pKCcas9-StrepT-switch. Next, two fragments, covering appropriately 1.0 kb of homologous upstream and downstream of *dptABC* within the daptomycin biosynthetic gene cluster, were amplified by PCR from genomic DNA of *S. roseosporus* NRRL 15998 with primer pairs *dptUp* F/R and *dptDn* F/R. The amplicons were assembled together and inserted into pKCcas9-StrepT-switch *via* a homologous recombination technology following the manufacturer's instructions (ClonExpress MultiS One Step Cloning Kit, Vazyme Biotech Co., Ltd.). A similar strategy was used for the construction of pKCcas9::*kasO*\*-KI StrepT-switch except that the constitutive *kasO*\* promoter was inserted between the upstream and downstream homologous fragments.

Plasmids for ZouA-mediated DNA amplification were constructed as described previously<sup>4</sup> with modifications. In brief, two fragments containing *RsA* and *RsB* were PCR-amplified from genomic DNA of *S. kanamyceticus* CGMCC 4.1441 with primer pairs *RsA* F/R and *RsB* F/R, respectively. The two fragments were then assembled with the *neo* cassette, and then used to capture the *act* gene cluster *via*  $\lambda$ -Red-mediated recombination<sup>5</sup>. The resulting pIJ10500::*act* containing the *act* gene cluster flanked by *RsA* at the left border, and the *neo* cassette and *RsB* at the right border. For

the construction of pSET152::StrepT-switch-*zouA*, the coding region of *zouA* was PCR-amplified from genomic DNA of *S. kanamyceticus* CGMCC 4.1441 with primer pair ZouA F/R. The resulting amplicon was used to replace the *neo* cassette in pSET152::TRS02-*neo* to generate pSET152::StrepT-switch-*zouA*.

### **Overexpression and Purification of RheA**

The coding region of *rheA* was PCR-amplified from genomic DNA of *S. albidoflavus* J1074 with primer pair rheA orfF/R. The PCR product was digested with *Nde*I and *Eco*RI, and then inserted into the corresponding sites of pET28a to generate pET28a::*rheA*. The recombinant plasmid was confirmed by DNA sequencing and subsequently introduced into *E. coli* BL21(DE3) for expression. RheA protein was overexpressed as a N-terminal His-tagged fusion protein, and purified using nickel-nitrilotriacetic acid (Ni-NTA) agarose chromatography according to the manufacturer's instructions (GE Healthcare). The purified protein was quantified following the protocol of a bicinchoninic acid (BCA) protein assay kit (Sangon Biotech Co., Ltd.).

### **EMSAs.**

The electrophoretic mobility shift assays (EMSAs) were performed essentially as described<sup>6</sup>. In brief, probes of *RS01* and *RS02* were PCR-amplified with primer pair rheO F/R from pSET152::TRS01-*neo* and pSET152::TRS02-*neo*, respectively. The probes were incubated with various concentrations of RheA in 20  $\mu$ L of reaction buffer containing 20 mM Tris-HCl (pH 7.5), 1 mM dithiothreitol (DTT), 5 mM MgCl<sub>2</sub>, 0.5 mg/ml bovine serum albumin (BSA), and 5 % glycerol. The *hrdB* promoter was used to serve as negative control. After incubation at 30 °C for 25 min, protein-bound DNA and free DNA were separated by electrophoresis on nondenaturing

4.5 % (wt/vol) polyacrylamide gels with a running buffer containing 45 mM Tris-HCl (pH 8.0), 45 mM boric acid, and 1 mM EDTA. Gels were stained with the fluorescent dye ethidium bromide, and imaged by a Bio-Rad GelDoc 2000 system.

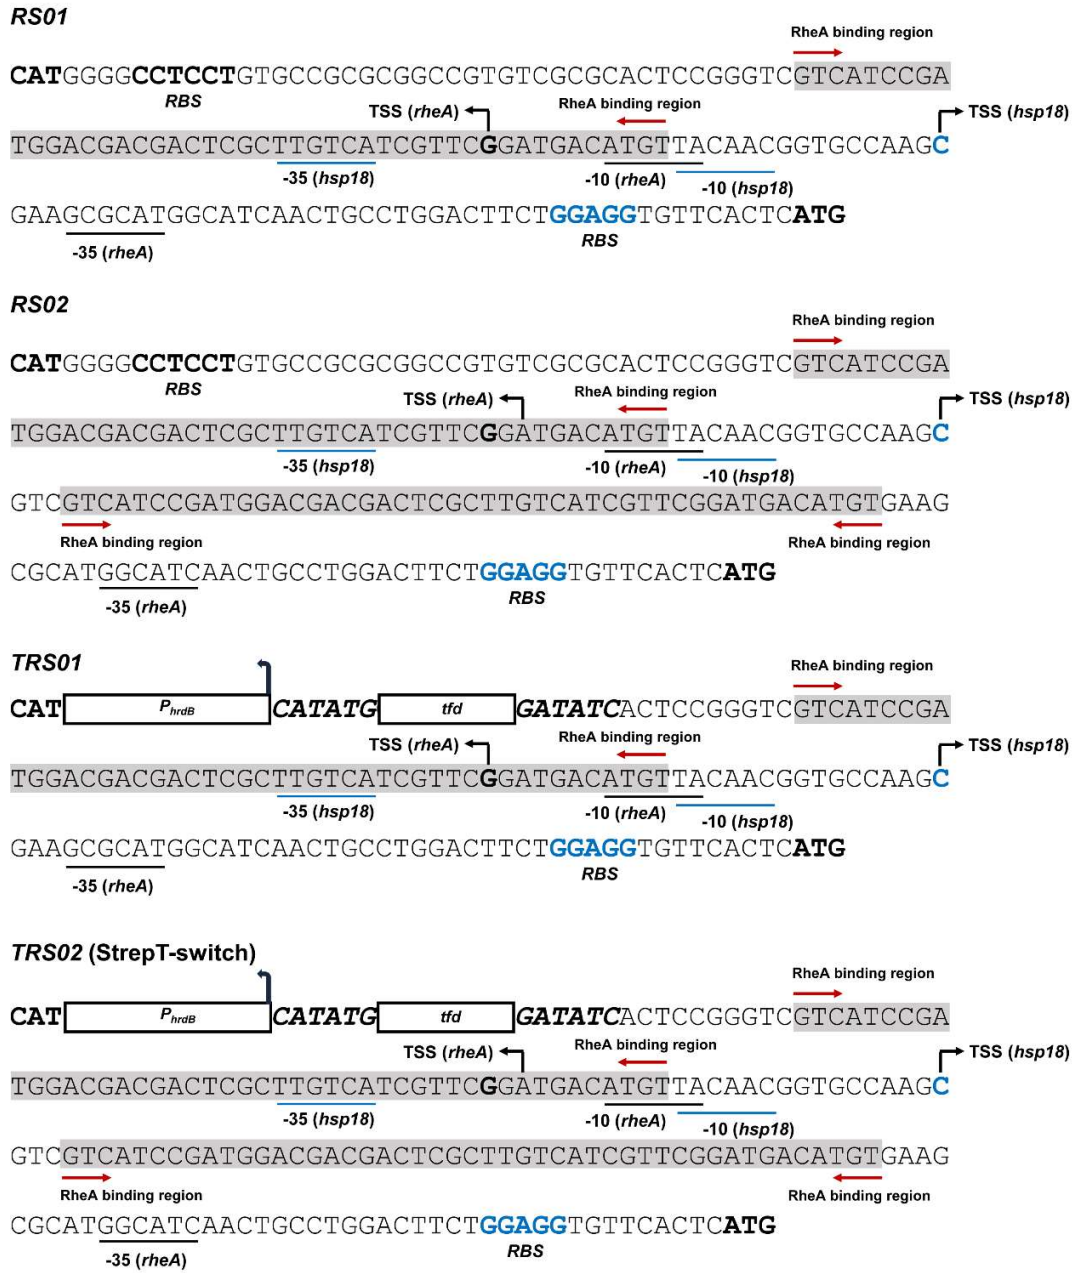

**Fig. 1 Sequences of the thermal inducible modules.** Promoter elements were as indicated. The RheA binding region was highlighted. The constitutive *hrdB* promoter was used to drive the expression of *rheA* in *TRS01* and *TRS02*. RBS, Ribosome Binding Site; TSS, Transcription Start Site; *tfd*, the *tfd* transcriptional terminator.

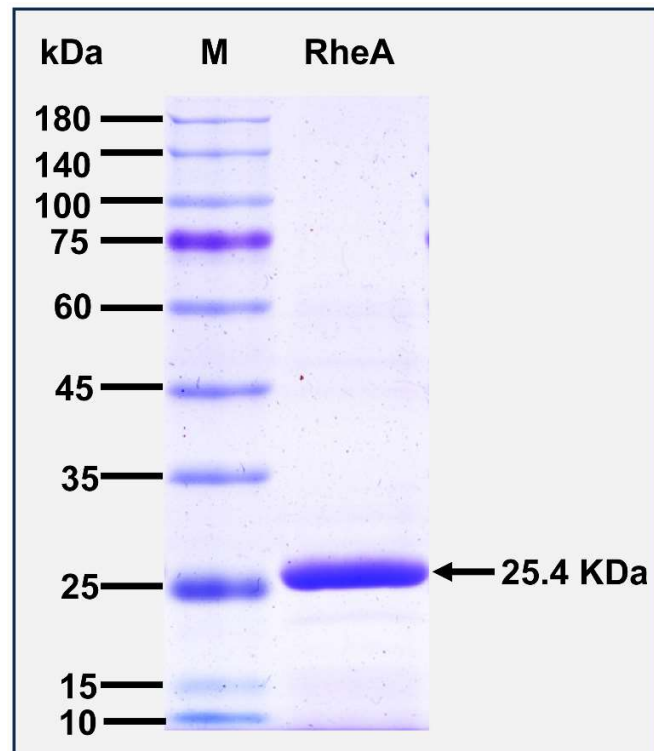

**Fig. 2 SDS-PAGE analysis of purified RheA.** M, molecular mass markers. Samples were separated by 12 % SDS-PAGE and stained with Coomassie brilliant blue R-250.

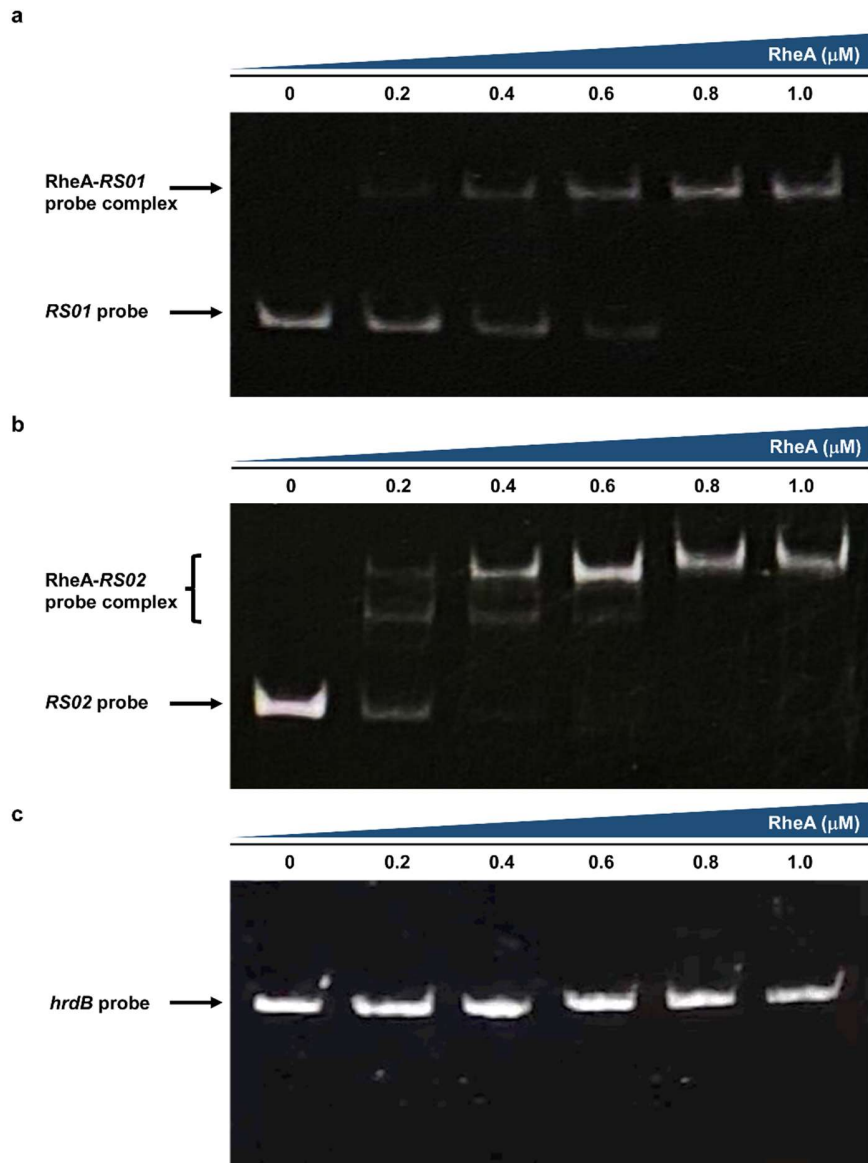

**Fig. 3 Binding of purified RheA to *RS01* and *RS02* probes.** Purified RheA protein was incubated with probes as indicated. The *hrdB* probe was included to serve as a negative control. DNA-protein complexes and free probes were indicated by brackets and arrows, respectively.



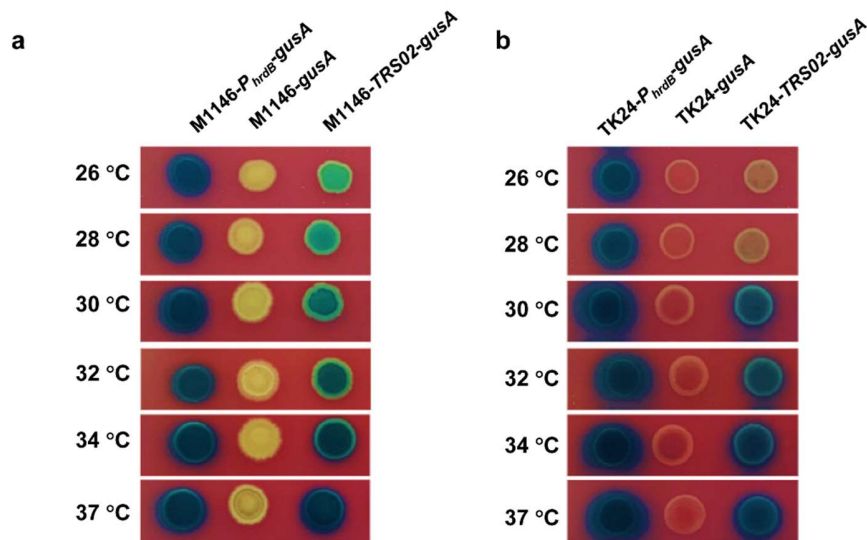

**Fig. 4 GusA production in uninduced and induced states.** The strains were cultivated on R2 agar plates at incubation temperature as indicated. The photograph was taken from the bottom of the plate after 5 days of cultivation. The representative image of three independent experiments with similar results was shown. J1074- $P_{hrdB}$ -gusA was included to serve as a positive control, while M1146-gusA was used as a negative control.

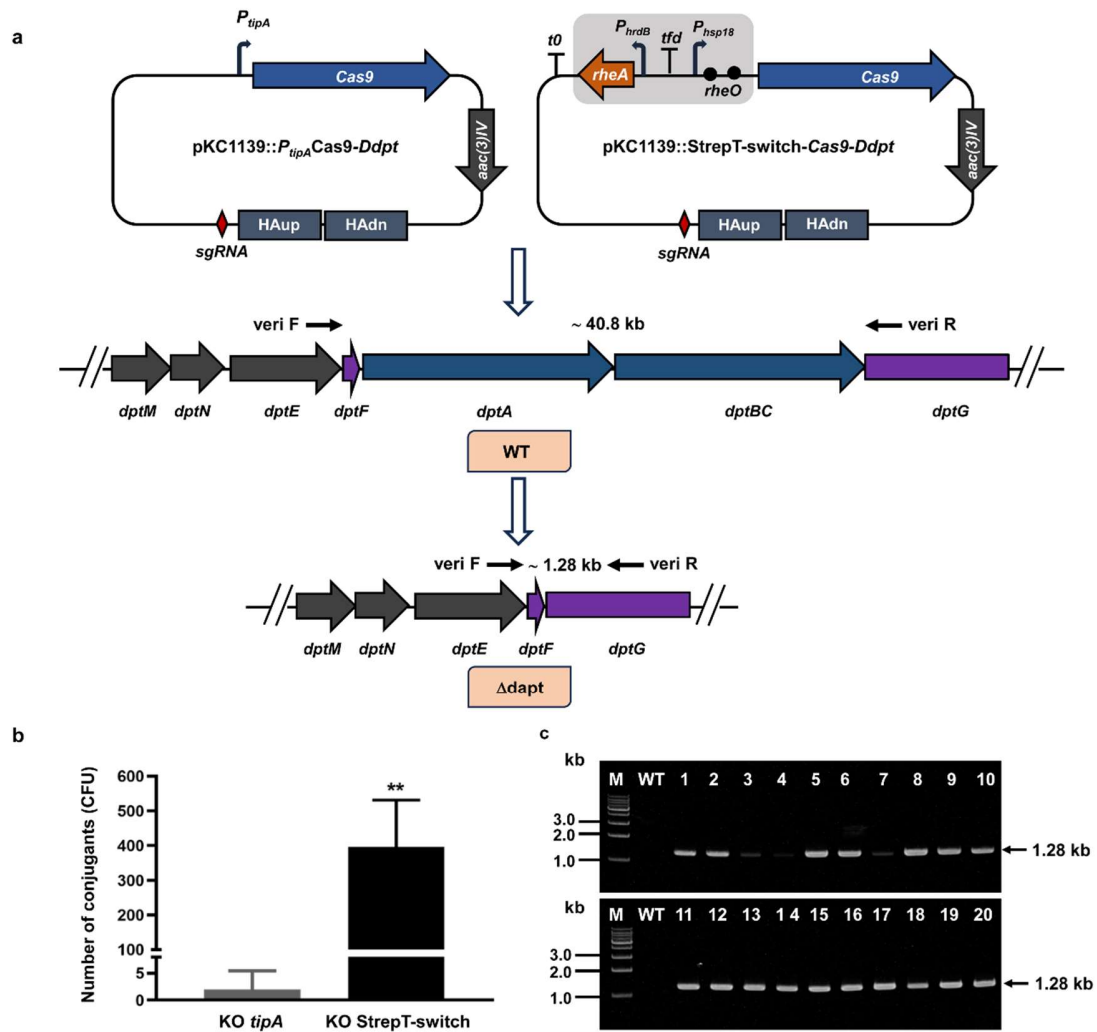

**Fig. 5 Thermal inducible CRISPR/Cas9-mediated target knock-out.** **a** CRISPR/Cas9-mediated knock-out of approximate 48 kb of the daptomycin gene cluster from the chromosome of *S. roseosporus*. The *tipA* promoter or StrepT-switch was used to drive the expression of Cas9. **b** Comparison of transformation efficiency between KO *tipA* and KO StrepT-switch. **c** Verification of transformants by PCR amplifications. The expected size of PCR amplicons was as indicated. Twenty transformants were randomly chosen for PCR amplifications.

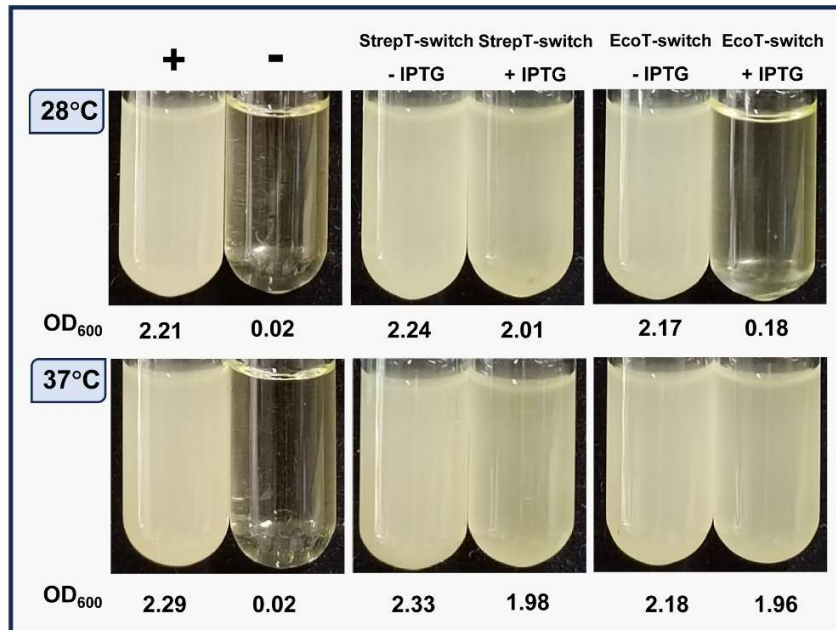

**Fig. 6 Evaluation of the thermal bio-switch in *E. coli*.** The StrepT-switch fails to switch off the expression of the *neo* cassette when the strain was cultivated at 28 °C. After codon optimization, the EcoT-switch is functional in *E. coli*. When cultivated at 28 °C, RheA repressor switched off expression of the *neo* cassette, and cells are unable to grow in the presence of kanamycin. When cultivated at 37 °C, the thermo-sensing repressor relieved its repression on the *neo* cassette, and cells grow normally in the presence of kanamycin.

### Supplementary References

1. Sun, J., Kelemen, H. G., Fernández-Abalos, M. J. & Bibb, J. M. Green fluorescent protein as a reporter for spatial and temporal gene expression in *Streptomyces coelicolor* A3(2). *Microbiology* **145**, 2221-2227 (1999).
2. Li, J. *et al.* NosP-regulated nosiheptide production responds to both peptidyl and small-molecule ligands derived from the precursor peptide. *Cell Chem. Biol.* **25**, 143-153 (2018).
3. Huang, H., Zheng, G., Jiang, W., Hu, H. & Lu, Y. One-step high-efficiency CRISPR/Cas9-mediated genome editing in *Streptomyces*. *Acta Biochim. Biophys. Sin.* **47**, 231-243 (2015).
4. Li, H., Gao, W., Cui, Y., Pan, Y. & Liu, G. Remarkable enhancement of bleomycin production through precise amplification of its biosynthetic gene cluster in *Streptomyces verticillus*. *Sci. China Life Sci.* **65**, 1248-1256 (2022).
5. Gust, B., Challis, L. G., Fowler, K., Kieser, T. & Chater, F. K. PCR-targeted *Streptomyces* gene replacement identifies a protein domain needed for biosynthesis of the sesquiterpene soil odor geosmin. *Proc. Natl Acad. Sci. USA* **100**, 1541-1546 (2003).
6. Liu, M. *et al.* Comparative and functional analyses reveal conserved and variable regulatory systems that control lasalocid biosynthesis in different *Streptomyces* species. *Microbiol. Spectr.* **11**, e0385222 (2023).
