# Supplementary material for: A tunable and reversible thermo-inducible bio-switch for streptomycetes
Source: Research Square preprint supplement (doi:10.21203/rs.3.rs-4838944/v1), 2024-08-08
Supplement: Supplementary file 2 [file 94ff21f5572890598d3350ba.xlsx]

## Sheet: Sheet1
Bacterial strains used in this study
Bacteria strains	Relevant Characteristics
Streptomyces Strains
J1074-RS01-neo	S. albidoflavus J1074 containing pSET152::RS01-neo, AprR, KanR
J1074-TRS01-neo	S. albidoflavus J1074 containing pSET152::TRS01-neo, AprR, KanR
J1074-TRS02-neo	S. albidoflavus J1074 containing pSET152::TRS02-neo, AprR, KanR
J1074-PhrdB-gusA	S. albidoflavus J1074 containing pSET152::PhrdB-gusA, AprR
J1074-gusA	S. albidoflavus J1074 containing pSET152::gusA, AprR
J1074-TRS02-gusA	S. albidoflavus J1074 containing pSET152::TRS02-gusA, AprR
J1074-PhrdB-egfp	S. albidoflavus J1074 containing pSET152::PhrdB-egfp, AprR
J1074-egfp	S. albidoflavus J1074 containing pSET152::egfp, AprR
J1074-TRS02-egfp	S. albidoflavus J1074 containing pSET152::TRS02-egfp, AprR
KI tipA	S. albidoflavus J1074 containing pKCCas9::kasO*-KI tipA, AprR
KI StrepT-switch	S. albidoflavus J1074 containing pKCCas9::kasO*-KI StrepT-switch, AprR
Svn StrepT-switch-dCas9-ftsZ	S. venezuelae ATCC 10712 containing pSET152::StrepT-switch-dCas9-ftsZ, AprR
M145 StrepT-switch-dCas9-actI1	S. coelicolor M145 containing pSET152::StrepT-switch-dCas9-actI1, AprR
M1146-actAB	S. coelicolor M1146 containing pIJ10500::act, HygR, KanR
M1146-actAB-pSET152	A derivative of M1146-act containing the empty pSET152, HygR, KanR, AprR
M1146-actAB-StrepT-switch-zouA	A derivative of M1146-act containing pSET152::StrepT-switch-zouA, AprR
M1146-PhrdB-gusA	S. coelicolor M1146 containing pSET152:: PhrdB-gusA, AprR
M1146-gusA	S. coelicolor M1146 containing pSET152::gusA, AprR
M1146-TRS02-gusA	S. coelicolor M1146 containing pSET152::TRS02-gusA, AprR
TK24-PhrdB-gusA	S. lividans TK24 containing pSET152::PhrdB -gusA, AprR
TK24-gusA	S. lividans TK24 containing pSET152::gusA, AprR
TK24-TRS02-gusA	S. lividans TK24 containing pSET152::TRS02-gusA, AprR
KO tipA	S. roseosporus NRRL 15998 containing pKCCas9::dptABC KO tipA, AprR
KO StrepT-switch	S. roseosporus NRRL 15998 containing pKCCas9::dptABC KO StrepT-switch, AprR
E. coli Strains
BL21-Pneo-neo	E. coli BL21 (DE3) containing pET23b::Pneo-neo, AmpR, KanR
BL21-neo	E. coli BL21 (DE3) containing pET23b::neo, AmpR
BL21-StrepT-switch	E. coli BL21 (DE3) containing pET23b::StrepT-switch-neo, AmpR, KanR
BL21-EcoT-switch	E. coli BL21 (DE3) containing pET23b::EcoT-switch-neo, AmpR, KanR
AprR, apramycin resistance; HygR, hygromycin resistance; AmpR, ampicillin resistance; KanR, kanamycin resistance.
