# Supplementary material for: A tunable and reversible thermo-inducible bio-switch for streptomycetes
Source: Research Square preprint supplement (doi:10.21203/rs.3.rs-4838944/v1), 2024-08-08
Supplement: Supplementary file 3 [file d4f303e185d3b449698dde4d.xlsx]

## Sheet: Sheet1
Primers used in this study.
Primers	Sequence (5´-3´) a,b	Purpose
RS01 F	GCCCGAGCACCAGTCGCGTAC	Construction of pSET152::RS01-neo
RS01 R	GAGTGAACACCTCCAGAAGTCC	Construction of pSET152::RS01-neo
neo orfF	ATGATTGAACAAGATGGATTGC	Construction of pSET152::RS01-neo
neo orfR	aattGAATTCGAGCTCGGTACCCGAACCCCAG	Construction of pSET152::RS01-neo
t0 F	aattTCTAGAATGCATTCAGCAGGTGGAAGAGGGAC	Construction of pSET152::RS01-neo
t0 R	CTGGTGCTCGGGCGGATCCGTCCAGTAATGACCTCAGAACTCC	Construction of pSET152::RS01-neo
hrdBp F	GGGCGGTCGGCGGTGGTCATGAACAACCTCTCGGAACGTTG	Construction of pSET152::TRS01-neo and pSET152::TRS02-neo
hrdBp R	GACGACAAAACTTTCATATGCCGCCTTCCGCCGGAACG	Construction of pSET152::TRS01-neo and pSET152::TRS02-neo
tfd F	CATATGAAAGTTTTGTCGTCTTTCCAGACG	Construction of pSET152::TRS01-neo and pSET152::TRS02-neo
tfd R	CGGATGACGACCCGGAGTGATATCCCCGGGAACCCGGCCGCG	Construction of pSET152::TRS01-neo and pSET152::TRS02-neo
gusA F	GACTTCTGGAGGTGTTCACTCATGACCGGTCTGCGGCCC	Construction of pSET152::TRS02-gusA
gusA R	CAGCTATGACATGATTACGAATTCTCACTGCTTCCCGCCCTG	Construction of pSET152::TRS02-gusA
egfp F	TTCTGGAGGTGTTCACTCCATATGGTGAGCAAGGGCGAGGAG	Construction of pSET152::TRS02-egfp
egfp R	CAGCTATGACATGATTACGAATTCTTACTTGTACAGCTCGTCCATGC	Construction of pSET152::TRS02-egfp
indC sgRNA F	aattACTAGTCCGGGGGAAGAGCTGCCCCCGTTTTAGAGCTAGAAATAG	Construction of pKCCas9::kasO*-KI StrepT-switch
indC sgRNA R	CTCAAAAAAAGCACCGACTC	Construction of pKCCas9::kasO*-KI StrepT-switch
indCUp F	GTCGGTGCTTTTTTTGAGTCGCTGCTCGGCTTCGCGAG	Construction of pKCCas9::kasO*-KI StrepT-switch
indCUp R	CGCCGGGGTCGGGCGTGG	Construction of pKCCas9::kasO*-KI StrepT-switch
indCDn F	CCACGCCCGACCCCGGCGTGTTCACATTCGAACGGTCTCTG	Construction of pKCCas9::kasO*-KI StrepT-switch
indCDn R	aattAAGCTTCCGGGTCAGTGTCGAGCAG	Construction of pKCCas9::kasO*-KI StrepT-switch
ftsZ sgRNA F	aattACTAGTAGACCATGTCGGCCCCCTTGGTTTTAGAGCTAGAAATAGCAAG	Construction of pSET152::StrepT-switch- dCas9-ftsZ
ftsZ sgRNA R	aattGAATTCGGGTGTACATCCAGTAATG	Construction of pSET152::StrepT-switch- dCas9-ftsZ
rheA orfF	aattCATATGATGACCACCGCCGACCGCCC	Construction of pET28a::rheA
rheA orfR	aattGAATTCTCAGGACCGCCCGGACGAGG	Construction of pET28a::rheA
rheO F	GATATCACTCCGGGTCGTCATCCG	PCR amplification of RS01 and RS02 probes
rheO R	GAGTGAACACCTCCAGAAGT	PCR amplification of RS01 and RS02 probes
dpt sgRNA F	aattACTAGTTCTCCTCGACTACCTTCGACGTTTTAGAGCTAGAAATAG	Knock-out of daptABC
dptUp F	GGCACCGAGTCGGTGCTTTTTTTGAGGTCGGCCACTTCCGCGCC	Knock-out of daptABC
dptUp R	CGGTCGGCCAACTGGGGC	Knock-out of daptABC
dptDn F	GCCCCAGTTGGCCGACCGCGCAGCGCGCGATGGAGGAC	Knock-out of daptABC
dptDn R	aattAAGCTTAGCCGCTGGATGACCGCC	Knock-out of daptABC
dpt VF	GCCGGTGACGCACCCCTG	Verification of knock-out mutants
dpt VR	GTCGGCGACCCGGGGTTC	Verification of knock-out mutants
RsA F	aatTCTAGACGGCCCGCTCAACCCCCGCT	Construction of pIJ10500::act
RsA R	aattAAGCTTAATTAACCCGTGACCGACACCCGCTGT	Construction of pIJ10500::act
RsB F	aattGATATCGCGATGAAGCTCGTCGAGATC	Construction of pIJ10500::act
RsB R	aattAAGCTTAGATCTGATGCCGAACGCGTGGTTCAG	Construction of pIJ10500::act
ZouA F	aattGAATTCAGGGAGATTGGCCCGGTGCAC	Construction of pSET152::StrepT-switch-zouA
ZouA R	aattCATATGGGATGGGTGACCATGATCG	Construction of pSET152::StrepT-switch-zouA
a Underlined sequences for restriction enzyme recognition sites; b italicized sequences for overlapping between DNA sequences.
